1 **Metatranscriptome analysis of the vaginal microbiota reveals potential**  
2 **mechanisms for protection against metronidazole in bacterial vaginosis**

3 Zhi-Luo Deng<sup>a#</sup>, Cornelia Gottschick<sup>a\*</sup>, Sabin Bhujra<sup>b</sup>, Clarissa Masur<sup>c</sup>, Christoph Abels<sup>c</sup>,  
4 and Irene Wagner-Döbler<sup>a</sup>

5  
6 <sup>a</sup> Research Group Microbial Communication, Department of Medical Microbiology, Helmholtz Centre  
7 for Infection Research, Inhoffenstr. 7, 38124 Braunschweig, Germany

8 <sup>b</sup> Genome Analytics, Helmholtz Centre for Infection Research, Inhoffenstr. 7, 38124 Braunschweig,  
9 Germany

10 <sup>c</sup> Dr. August Wolff GmbH & Co. KG Arzneimittel, Sudbrackstrasse 56, 33611, Bielefeld, Germany

11

12 Running title: Activity profiling of the vaginal microbiota

13

14 # Address correspondence to Zhi-Luo Deng, Zhiluo.Deng@helmholtz-hzi.de

15 Z.-L.D. and C.G. contributed equally to this work.

16 \* Present address: Institute for Medical Epidemiology, Biometrics and Computer Science, Martin-  
17 Luther-University Halle-Wittenberg, Halle (Saale), Germany

18

## 19 **Abstract**

20 Bacterial vaginosis (BV) is a prevalent multifactorial disease of women in their reproductive  
21 years characterized by a shift from the *Lactobacillus* spp. dominated microbial community  
22 towards a taxonomically diverse anaerobic community. For unknown reasons, some women  
23 do not respond to therapy. In our recent clinical study, out of 37 women diagnosed with BV,  
24 31 were successfully treated with metronidazole, while 6 still had BV after treatment. To  
25 discover possible reasons for the lack of response in those patients, we performed a  
26 metatranscriptome analysis of their vaginal microbiota, comparing them to patients who  
27 responded. Seven out of 8 Cas genes of *Gardnerella vaginalis* were highly up-regulated in  
28 non-responding patients. Cas genes, in addition to protecting against phages, might be  
29 involved in DNA repair thus mitigating the bactericidal effect of DNA damaging agents like  
30 metronidazole. In the second part of our study, we analyzed the vaginal metatranscriptomes of  
31 four patients over three months and showed high *in vivo* expression of genes for pore-forming  
32 toxins in *L. iners* and of genes encoding enzymes for the production of hydrogen peroxide and  
33 D-lactate in *L. crispatus*.

34

## 35 **Importance**

36 Bacterial vaginosis is a serious issue for women in their reproductive years. Although it can  
37 usually be cured by antibiotics, the recurrence rate is very high, and some women do not  
38 respond to antibiotic therapy. The reasons for that are not known. Therefore we undertook a  
39 study to detect the activity of the complete microbiota in the vaginal fluid of women that  
40 responded to antibiotic therapy and compared it to the activity of the microbiota in women  
41 that did not respond. We found that one of the most important pathogens in bacterial  
42 vaginosis, *Gardnerella vaginalis*, has activated genes that can repair the DNA damage caused  
43 by the antibiotic in those women that do not respond to therapy. Suppressing these genes  
44 might be a possibility to improve the antibiotic therapy of bacterial vaginosis.

45

## 46 **Introduction**

47 The healthy vaginal microbiome is characterized by low pH and low diversity and can be  
48 categorized into community state types (CSTs) that are dominated by different *Lactobacillus*  
49 spp. such as *L. crispatus*, *L. iners*, *L. gasseri* and less frequently *L. jensenii* or a more diverse  
50 community (1). Bacterial vaginosis (BV) is a frequent multifactorial disease of women in  
51 their reproductive years that is characterized by a shift of this *Lactobacillus* spp. dominated  
52 bacterial community to a community of various mostly anaerobic bacteria (2). BV is  
53 associated with a higher risk of preterm birth and of acquiring sexually transmitted infections  
54 such as HIV (3). The most common bacteria found in BV, identified by 16S rRNA gene  
55 sequencing, are *Gardnerella*, *Atopobium*, *Prevotella*, *Bacteroides*, *Peptostreptococcus*,  
56 *Mobiluncus*, *Sneathia*, *Leptotrichia*, *Mycoplasma* and BV associated bacterium 1 (BVAB1) to  
57 BVAB3 of the order Clostridiales. Recently, three CSTs dominated by *Gardnerella vaginalis*,  
58 Lachnospiraceae and *Sneathia sanguinegens*, respectively, have been described (4). In our  
59 recent clinical study *S. amnii* was identified as the best biomarker for BV (5).

60 The most important pathogen in BV is *Gardnerella vaginalis* (6). It is currently the only  
61 described species in the genus *Gardnerella*, but genome comparisons suggest that it can be  
62 separated into four genetically isolated subspecies (7). While they cannot be resolved by 16S  
63 rRNA gene sequencing, the universal target from the chaperonin-60 gene separates the  
64 species into the same four subgroups (group A, clade 4; subgroup B, clade 2; subgroup C,  
65 clade 1; subgroup D, clade 3) (6,8,9). All four subgroups of *G. vaginalis* can be detected in  
66 the vaginal microbiota of healthy women throughout the menstrual cycle (10). Subgroup A  
67 and C define distinct CSTs in health (11). Isolates from the four subgroups of *G. vaginalis*  
68 differ in their virulence as well as in their resistance against metronidazole. The sialidase  
69 activity of *G. vaginalis* is an important virulence factor and it was detected in all isolates from

70 subgroup B and few isolates of subgroup C but not in subgroups A and D isolates (12). The  
71 presence of sialidase activity is used for diagnosis of BV in a commercial kit (13). Resistance  
72 against metronidazole was found in subgroups A and D isolates, while those from subgroups  
73 B and C were highly susceptible (14).

74 Metronidazole is a widely applied chemotherapeutic agent used to treat infectious diseases  
75 caused by anaerobic bacteria, and it is the first-line antibiotic for treating BV (15,16).

76 Metronidazole is a prodrug which requires enzymatic reduction within the cell, which occurs  
77 under anaerobic conditions only, to transform it into an active form (17). Activated  
78 metronidazole acts by covalently binding to DNA, disrupting its helical structure and causing  
79 single and double strand breaks that lead to DNA degradation and death of the pathogens  
80 (17). Resistance can therefore be mediated by lack of activation of the prodrug, or by repair of  
81 DNA damage, and has been studied in various pathogens. In *Helicobacter pylori* and  
82 *Campylobacter spp.* ferredoxin, ferredoxin/ferredoxin-NADP reductase (FNR) and  
83 nitroreductase contribute to metronidazole resistance (17). In *Bacteroides fragilis*, genes  
84 responsible for DNA repair like recA and recA-mediated autopeptidase (Rma) and a gene  
85 named nitroimidazole resistance gene (*nim*) encoding a nitroimidazole reductase were shown  
86 to confer resistance against metronidazole (18,19). Failure of BV treatment by metronidazole  
87 is relatively rare (5,20). It is unclear if it is caused by resistance of the BV pathogens to  
88 metronidazole, and which mechanisms are acting *in vivo*. A recent study has demonstrated  
89 that failure of treatment of BV with metronidazole is not associated with higher loads of *G.*  
90 *vaginalis* and *A. vaginae* (21). Isolates from *G. vaginalis* subgroups A and D are intrinsically  
91 resistant against metronidazole, but the underlying mechanism is unknown (14).

92 Until now, the majority of studies regarding the vaginal microbiota have focused on 16S  
93 rRNA gene sequencing, answering only questions on the taxonomic composition of bacterial

94 communities but not on their functions (2). A metatranscriptome analysis comparing vaginal  
95 swabs from two women with BV with two healthy subjects showed that *L. iners* upregulates  
96 transcription of the cholesterol-dependent cytolysin (CDC) and of genes belonging to the  
97 clustered regularly interspaced short palindromic repeats (CRISPR) system in BV (22). No  
98 study has investigated the activity shifts of the vaginal microbiota during antibiotic treatment  
99 of BV.

100 We had previously analyzed the vaginal microbiota in the context of a clinical trial using 16S  
101 rRNA gene sequencing (5). Of 37 patients diagnosed with BV and included in this study, 31  
102 were initially cured by a single oral dose of metronidazole. Six patients did not respond, i.e.  
103 they were still diagnosed with BV according to Nugent score after antibiotic therapy. Here we  
104 asked if differences in the activity of the microbiota might be responsible for the lack of  
105 response in those six patients. We therefore analyzed their metatranscriptomes at the time of  
106 diagnosis of BV (visit 1) and after treatment with metronidazole (visit 2) and compared them  
107 to those of 8 patients that responded to treatment according to Nugent score.

108 The high rate of recurrence is another crucial problem for BV treatment. The one-year  
109 recurrence rate of BV ranges from 40% to 80% after therapy with metronidazole (23) or  
110 clindamycin cream (24). CST dominated by *L. iners* might have an increased probability to  
111 shift to a dysbiotic state (22,25,26). In the second part of our study, we therefore followed the  
112 activity of the microbiota from four of the patients that initially responded to metronidazole  
113 treatment over a period of 3 months (visit 3-5) and analyzed gene expression of *L. crispatus*  
114 and *L. iners* *in vivo*.

115 We show the importance of *G. vaginalis* for BV, which can be massively underestimated  
116 using 16S rRNA gene sequencing. The relative abundance of the four subgroups of *G.*  
117 *vaginalis* could be determined in responders and non-responders. Transcripts potentially

118 leading to lack of response to metronidazole treatment were identified. CRISPR-Cas genes are  
119 suggested as a novel mechanism of *G. vaginalis* to mitigate the DNA damaging effect of  
120 metronidazole. *L. iners* highly expressed genes for pore-forming toxins *in vivo*, and in *L.*  
121 *crispatus* the most highly expressed transcripts *in vivo* encoded enzymes for D-lactate and  
122 hydrogen peroxide production.

123

## 124 **Results**

### 125 **Study population and overview of sequencing results**

126 We studied the vaginal microbiome of 14 patients during and after metronidazole treatment of  
127 BV using metatranscriptome sequencing (Fig. 1A). Patients were part of a clinical trial  
128 described elsewhere (5). In the first part of the study, we analyzed samples from two  
129 timepoints (diagnosis of BV, visit 1) and after metronidazole treatment (visit 2). Eight patients  
130 responded to treatment, and six patients did not respond to treatment with the antibiotic, so  
131 were still BV positive according to Nugent score at visit 2. In the second part of our study,  
132 three additional timepoints were analyzed for four of the patients that initially responded to  
133 metronidazole therapy, covering a total period of 3 months. Those four patients belonged to  
134 the lactic acid arm of the clinical study. Two of them experienced recurrence, while the other  
135 two were stably non-BV after treatment according to Nugent score (details in Table S1 sheet  
136 1). In total, we analyzed 40 vaginal fluid samples, 22 with BV status and 18 without.  
137 Metatranscriptome sequencing resulted in a total of 1,879,945,342 reads. Of these,  
138 1,377,516,082 reads (73%) were left after quality filtering and removal of ribosomal RNA  
139 (Table S1 sheet 2). On average, 34 million reads were analyzed per sample.

140 **Construction of the reference genome and gene databases for taxonomic and activity**  
141 **profiling**

142 Human reads comprised ~11% (BV) versus ~56% (non-BV) of the total putative mRNA reads  
143 based on the standard Kraken (27) database (Table S1 sheet 2). This suggests that the  
144 bacterial load is much lower in non-BV than in BV since the human contamination is much  
145 higher in non-BV. Using the standard Kraken database, only 41% of total putative microbial  
146 (non-human) mRNA reads could be assigned taxonomically (Table S1 sheet 2). To improve  
147 the fraction of taxonomically assignable reads we then constructed a refined database  
148 (ref\_Genome) which combined the urogenital subset of the HMP (28) database (147  
149 genomes) and all species which are not included in the urogenital subset of the HMP database  
150 but detected by the standard Kraken database with an abundance >1% (7 genomes). We also  
151 added *S. amnii* and *S. sanguinegens* which had previously been shown to be highly abundant  
152 based on 16S rRNA gene sequencing (5) but were not contained in either HMP or the  
153 standard Kraken reference database. There are four *G. vaginalis* strains in the HMP database,  
154 of which one belongs to subgroup A and three belong to subgroup C. Given the importance  
155 and high intra-species diversity of *G. vaginalis*, we added 5 additional *G. vaginalis* genomes  
156 based on the genome tree reported in the NCBI database and the completeness of the genome  
157 assembly; these five strains cover all four subgroups. We added the genomes of *Gardnerella*  
158 sp. 26-12 and *Gardnerella* sp. 30-4 which were isolated from the bladder recently (29). They  
159 were classified into *G. vaginalis* subgroup A based on sequence homology (29). In total, this  
160 database contained 163 bacterial genomes from 105 species (Table S1 sheet 3). Using this  
161 database, the rate of taxonomically classified putative microbial mRNA reads could be  
162 improved to 86% on average (Table S1 sheet 2).



163 For functional assignment, we constructed a reference gene database (ref\_Gene) (Table S1  
164 sheet 4). It was based on the same genomes as the ref\_Genome database, except that the seven  
165 additional *Gardnerella* spp. genomes were not included because of the low quality of the  
166 annotation of coding sequences. The ref\_Gene database contained 301,323 genes. To  
167 investigate the activity shifts of the communities, we mapped the cleaned metatranscriptomic  
168 reads to the ref\_Gene database using BWA. In total, 78% of total putative microbial mRNA  
169 reads could be mapped to the ref\_Gene. Per sample, on average 8.9 million microbial mRNA  
170 reads could be mapped with MAPQ >10 (Table S1 sheet 2).

171 **Shifts in the taxonomic composition of the active community following metronidazole**  
172 **treatment**

173 The taxonomic composition of transcripts was determined using Kraken and the ref\_Genome  
174 database. Fig. 1B shows that in all communities with BV status the most abundant species  
175 were *G. vaginalis*, *A. vaginae*, *S. amnii* and *Prevotella timonensis*. In the post treatment  
176 communities from responders (non-BV, Nugent score <6) the metatranscriptomes were  
177 dominated by *L. crispatus*, *L. iners* and *L. jensenii*, representing typical CSTs of the healthy  
178 female microbiota.

179 On average less than 14 species contributed >90% of the mapped reads in BV and 3 species  
180 accounted for >90% of the mapped reads in non-BV (Fig. 1C). The individual dominance  
181 plots showed the same pattern where 10 species contributed >90% of the metatranscriptomes  
182 for most patients in BV. In non-BV, this number was 2 for most patients and the dominance  
183 curves were extremely steep. For comparison, in the periodontal metatranscriptome more than  
184 100 species were required to cover 90% of mapped reads (30). These data show that the active  
185 microbiota in BV is much less diverse than suggested by 16S rRNA gene sequencing.

186 *G. vaginalis* was the most dominant active species in BV. To estimate the relative abundance  
187 of the four subgroups of *G. vaginalis*, we extracted all reads assigned to *G. vaginalis* from the  
188 metatranscriptomes and assigned them to the four strains representing subgroups A-D,  
189 respectively (409-05, 00703Bmah, HMP9231, 00703Bmash) using Kraken. For this analysis,  
190 we used samples from visit 1 where *G. vaginalis* reads comprised at least 20% of all reads,  
191 which included all 6 patients without response to treatment, and 5 of the 8 patients that  
192 responded to treatment. Figure 1D shows that on average >95% of the reads could be mapped  
193 to the four subgroups and only on average 7% were assigned ambiguously. In those patients  
194 that did not respond to treatment, subgroups A and D comprised  $68.5 \pm 17.2$  % of all reads,  
195 while they accounted for  $30.5 \pm 29.3$ % of all reads in patients that responded to treatment  
196 (Wilcoxon test  $P=0.0520$ ). We observed that *Gardnerella* spp. previously isolated from the  
197 bladder (*Gardnerella* sp. 26-12 and *Gardnerella* sp. 30-4) (29) contributed on average 6% of  
198 all taxonomically assigned reads in BV (Fig. S1).

### 199 **Comparison of the taxonomic composition of vaginal fluid samples between** 200 **metatranscriptome and 16S rRNA gene sequencing**

201 We compared the taxonomic composition determined using 16S rRNA sequencing previously  
202 (5) and the taxonomic composition of the metatranscriptome determined here by Kraken with  
203 the ref\_Genome database. In non-BV, we did not observe any considerable difference for the  
204 four most abundant species (Table S1 sheet 6), while in BV large differences between the two  
205 datasets were found. Fig. 2 shows the top 12 most abundant taxa identified using 16S rRNA  
206 gene sequencing and metatranscriptomics, respectively. Most of the abundant species  
207 identified in the mRNA sequencing data set were also identified using 16S rRNA gene  
208 amplicon sequencing, although usually at different abundances. For example, *A. vaginae*  
209 comprised 13% of all reads based on 16S rRNA gene sequencing, but only 11% in the

210 metatranscriptome dataset. The most pronounced difference was observed for *G. vaginalis*  
211 which comprised on average 47% of relative abundance in the metatranscriptome and on  
212 average only 5% in the 16S rRNA sequencing data. Several additional differences were  
213 found: Higher level taxa like Veillonellaceae (family) or *Parvimonas* (genus) are not listed  
214 among the top 12 taxa of the metatranscriptome, because mapping occurred to species level,  
215 and the abundance of individual species of these higher order taxa was too low to be found  
216 among the top 12 taxa (Table S1 sheet 6). BVAB2 is readily detected by PCR and is an  
217 important indicator of BV, but it is not yet cultivated and so there is no genome available to  
218 map the reads against.

### 219 **Global community profiling in non-BV and BV**

220 In order to profile the function of the communities, all cleaned putative mRNA reads (Table  
221 S1 sheet 2) were mapped using BWA onto the ref\_Gene database annotated with KEGG  
222 ortholog (KO) genes. We used principal component analysis (PCA) to visualize the difference  
223 between the microbiota in BV and non-BV on the level of taxonomy (16S rRNA gene) (Fig.  
224 3A), taxonomic composition of expressed genes (metatranscriptome) (Fig. 3B) and functional  
225 annotation of transcripts to KEGG orthologues (KO genes) (Fig. 3C). Figure 3A shows that  
226 the non-BV communities form a tight cluster on the level of the 16S rRNA sequencing, while  
227 BV communities vary, in accordance with the studies using amplicon sequencing of BV. *L.*  
228 *iners*, *Prevotella* spp., *G. vaginalis*, *A. vaginae* and *S. amnii* drive the separation between non-  
229 BV and BV On the level of the taxonomic composition of the metatranscriptomes (Fig. 3B)  
230 this pattern was reversed; samples from non-BV were much more heterogeneous than those  
231 from BV. The non-BV communities clustered into two groups dominated by *L. iners* and *L.*  
232 *crispatus* respectively, whereas *G. vaginalis*, *A. vaginae* and *S. amnii* were abundant in BV.  
233 This reversal is even stronger on the level of KO genes (Fig. 3C): Samples from BV form a

234 tight cluster, while those from non-BV vary widely. It is the opposite pattern than that found  
235 for the phylogenetic marker gene. The KO genes that contributed most to these differences in  
236 non-BV were phosphofructokinase isozyme *pfkA* (31) and ribosomal protein coding genes  
237 *rpsI*, *rpmF* and *rplU* (32,33). In BV, *msmE*, *cycB* and *pflD* genes that encode proteins  
238 involved in carbohydrate uptake and metabolism (34,35) were stably higher expressed.

### 239 ***In vivo* expression of putative metronidazole resistance associated genes in *G. vaginalis***

240 To clarify the possible contribution of genes related to metronidazole resistance in Gram  
241 positive pathogens to the difference in response to treatment of the vaginal microbiota, we  
242 examined their expression (Table S1 sheet 9) in *G. vaginalis*. For this analysis, BV  
243 communities from 11 patients at visit 1 were analyzed in which the level of *G. vaginalis*  
244 transcripts was >20%. Six of these patients did not respond to treatment and five responded.  
245 Although *A. vaginae* and *S. amnii* are also key players in BV we could not analyze them here  
246 since there were too few samples dominated by them. As shown in Fig. 4A, there was no clear  
247 expression pattern for most of these genes (detailed data in Table S1 sheet 9). The only  
248 significantly changed gene expression was that of the gene encoding ferredoxin which was  
249 less active in *G. vaginalis* in non-responding patients (fold change=1.67, Wilcoxon test  
250  $P=0.00866$  based on relative abundance = read count of given genes of *G. vaginalis* / read  
251 count of *G. vaginalis* %).

### 252 **CRISPR associated protein coding genes of *G. vaginalis* were strongly up-regulated in** 253 **vaginal fluids of patients not responding to treatment**

254 We then performed a global analysis of differential expression of KO genes of *G. vaginalis* in  
255 these same communities (visit 1, 11 BV samples with >20% transcripts from *G. vaginalis*  
256 including 6 patients that did not respond to treatment and 5 that responded). We observed that

257 there were 9 KO genes highly up-regulated with FDR  $\leq 0.05$  (log<sub>2</sub> fold change up to 9.46)  
258 in communities without response. Strikingly, among the most strongly up-regulated KO  
259 genes, seven were *cas* genes (36) (Fig. 4B). In total there were 8 different *G. vaginalis*  
260 CRISPR-associated (Cas) genes found in the genomes, namely *cas1-3*, *casA-E*, of which  
261 seven were up-regulated (*cas1-3*, *casA-D*).

262 There were 9 KO genes down-regulated but the fold change values were not as high as for the  
263 up-regulated genes. *fucP* (fucose permease) was identified as the most strongly down-  
264 regulated gene with a log<sub>2</sub> fold change of -4.24.

### 265 **Time course of activity profiles and recurrence**

266 In the second part of our study, we analyzed the metatranscriptome of vaginal fluid samples  
267 from four of the patients that initially responded to therapy with metronidazole for the  
268 complete duration of the clinical trial. Two of these patients experience recurrence of BV, and  
269 two remained stably non-BV. Five timepoints were analyzed of which the first two were  
270 already shown in Fig. 1A. They represented acute BV (visit 1) and after metronidazole  
271 therapy (visit 2). Here, we also show visit 3-5, which were all non-BV, with the exception of  
272 recurrence at visit 5 in patient 04\_001 and at visit 3 in patient 06\_004. Fig. 5A shows the  
273 taxonomic composition of the communities. In one of the two patients that stably maintained  
274 a non-BV status *L. crispatus*, and in the other *L. iners* dominated the microbiota. The  
275 principal components analysis of the activity profiles is shown in Fig. 5B. In acute BV,  
276 samples from all four patients clustered together (red circle). After the treatment, samples  
277 from patient 08\_006 who was stably non-BV moved into a very dense and distinct cluster  
278 (illustrated by the arrow 1 and enclosed by a green circle). Samples from patient 13\_019 who  
279 also remained stably non-BV moved to a different cluster after treatment, shown by arrow 2  
280 and encircled blue.

281 The activity shifts in patient 06\_004, who experienced recurrence at visit 3, were especially  
282 noteworthy: After treatment, the community moved towards an activity profile distinct from  
283 all others (arrow 3). The recurrence of BV caused the community to shift back to the BV  
284 cluster (red circle, arrow 4). At visit 4, the community moved to the non-BV cluster (blue  
285 circle) and the patient became non-BV according to the Nugent score. We speculate that there  
286 was an unknown intervention after visit 3 which changed the microbiome but this was not  
287 recorded. Interestingly, the other case of recurrence (patient 04\_001) had a different  
288 progression. From visit 2 to 4, patient 04\_001 was non-BV and these samples clustered  
289 together in the “non-BV” cluster indicated by the blue circle. At visit 5, however, patient  
290 04\_001 had recurrent BV and the community shifted back again to the BV cluster.

### 291 **Transcriptomics of *L. iners* and *L. crispatus* in vivo**

292 The stable colonization of the vaginal fluid of two patients that responded to antibiotic  
293 therapy with either *L. iners* or *L. crispatus* allowed us to profile their gene expression *in vivo*  
294 to gain more understanding of their different roles in the vaginal microbiota. We extracted the  
295 reads mapped on *L. crispatus* in patient 08\_006 (timepoint b-e) and *L. iners* in patient 13\_019  
296 (timepoint b-e) and performed a differential expression (DE) analysis using edgeR to compare  
297 their activity profiles based on their KO genes comparing the expression of KO genes of *L.*  
298 *crispatus* in *L. crispatus* dominated samples (n = 4) with the expression of KO genes of *L.*  
299 *iners* in *L. iners* dominated samples (n = 4). The Venn diagram in Fig. 5C shows that the two  
300 species share 569 KO genes, while 58 are unique to *L. iners* and 244 are unique for *L.*  
301 *crispatus*, indicating *L. crispatus* possesses far more diverse functions than *L. iners*. The DE  
302 analysis identified 654 significantly differentially expressed KO genes, of which 393 were up-  
303 regulated in *L. crispatus* (Table S1 sheet 8). Among the top 100 most differentially expressed  
304 KO genes in terms of FDR value, 64 were up-regulated in *L. crispatus*, Remarkably, genes

305 encoding enzymes involved in the production of H<sub>2</sub>O<sub>2</sub> (pyruvate oxidase, NADH oxidase,  
306 glycolate oxidase) (37,38) were highly expressed in *L. crispatus* (Table S1 sheet 8, KO genes  
307 colored in blue). D-lactate dehydrogenase (K03778) was the most highly expressed gene in *L.*  
308 *crispatus* (log<sub>2</sub> CPM = 13.3, Table S1 sheet 8, colored in light green) and this gene is absent  
309 in the genome of *L. iners*. On the other hand, we found that inerolysin (INY) was highly  
310 expressed (log<sub>2</sub> CPM = 9.8) in *L. iners*, but absent in the genome of *L. crispatus* (Table S1  
311 sheet 8, colored in red). Interestingly, we also found the orthologous gene (K11031) of  
312 inerolysin known as vaginolysin (39) highly expressed in *G. vaginalis* (details in Table S1  
313 sheet 7). Hemolysin C, another pore forming toxin, was highly expressed (log<sub>2</sub> CPM = 9.8) in  
314 *L. iners* but absent in *L. crispatus*.

## 315 **Discussion**

316 The aim of this study was to identify activity patterns in the vaginal fluid microbiota in BV  
317 and after metronidazole therapy. In particular, we compared the transcriptional profiles of *G.*  
318 *vaginalis* in vaginal microbiota from patients who did and did not respond to metronidazole  
319 treatment, respectively. This is the first study to investigate the activity alterations of the  
320 vaginal microbiota from patients with BV during treatment with the antibiotic metronidazole  
321 using the metatranscriptomics approach. We found several changes in gene expression in non-  
322 responding patients that might contribute to resistance against metronidazole by either not  
323 activating the pro-drug or repairing DNA damage.

324 *G. vaginalis* was the most dominant active species in BV. *G. vaginalis* can be divided into  
325 four phylogenetic subgroups which may in the future be described as subspecies and which  
326 differ in virulence and susceptibility to metronidazole (6,12). We found transcripts from all  
327 four subgroups in all patients, as previously shown based on sequencing of the universal  
328 target cp-60 gene (6,9,11). Interestingly, in those patients that did not respond to treatment,

329 *Gardnerella* subgroups A and D which are resistant to metronidazole (14) were slightly more  
330 abundant.

331 Sequencing of phylogenetic marker genes like the 16S rRNA gene or the cpn60 universal  
332 target is a fast and sensitive method to profile the microbiota composition, but it does not  
333 provide functional information and is prone to PCR bias. Moreover, DNA from dead cells  
334 might also be detected. Therefore, we compared the taxonomic composition of the transcripts  
335 with that of the 16S rRNA genes determined previously in those samples (5). We observed  
336 that *G. vaginalis* comprised on average 47% of all transcripts in BV, while only 5% of 16S  
337 rRNA genes were assigned to this species. This suggests that *G. vaginalis* is transcriptionally  
338 more active than other vaginal bacteria; moreover, the commonly used 27F primer was  
339 previously shown to underrepresent *G. vaginalis* (40). Other differences between the two  
340 methods are caused by the low taxonomic resolution of the 16S rRNA gene, especially of  
341 short amplicons, where a large fraction of 16S rRNA reads is assigned to higher level taxa,  
342 e.g. genus or family. By contrast, the metatranscriptome reads are mapped to genomes and so  
343 have species level resolution. Finally, transcripts can only be mapped if a genome is available.  
344 If the species in question has not yet been cultivated, as for example the BVAB strains, then  
345 reads cannot be assigned. In the periodontal pocket microbiota, about 50% of all reads cannot  
346 be mapped to any bacterial genome (30). By contrast, the vaginal microbiota is much less  
347 diverse and most of its representatives have been cultivated; using the improved ref\_Genome  
348 database, we were able to map 86% of all reads, indicating that uncultivated taxa did not  
349 contribute very significantly to the active community in BV and after metronidazole therapy.

350 Low diversity in health and high diversity in BV is a hallmark of BV and it is so striking that  
351 it has even been suggested to use diversity indices based on PCR amplified 16S rRNA genes  
352 in addition to the clinical diagnosis based on Amsel criteria and Nugent score (4,41-43). Our



353 comparison between communities in BV and after metronidazole therapy on the levels of (1)  
354 16S rRNA gene, (2) taxonomic composition of total transcripts, and (3) functional profiling  
355 based on KO genes shows a reversal of this observation: BV communities, although highly  
356 diverse on the taxonomic level, cluster tightly together on the functional level of KO genes.  
357 On the contrary, non-BV communities are similar on the taxonomic level, but highly diverse  
358 among individuals on the functional level.

359 In our metatranscriptome analysis we found evidence for mechanisms that hinder the  
360 activation of the metronidazole prodrug, or mitigate the damage that metronidazole inflicts on  
361 DNA, and thus could be important reasons for the lack of response in some women.

362 We show that the ferredoxin gene of *G. vaginalis* was less active in those patients that did not  
363 respond to metronidazole. As an electron carrier, ferredoxin is downregulated in *H. pylori*  
364 bacteria grown in the presence of metronidazole (17). It is required for activation of the  
365 prodrug in *H. pylori* (44) and might have a similar role in *G. vaginalis*. Lack of response  
366 might result from lack of activation of the prodrug. Unexpectedly, the nitroimidazole  
367 resistance (*nim*) gene, which has been shown to mediate resistance to metronidazole in *B.*  
368 *fragilis* by transforming metronidazole to a non-toxic amino derivative (16) was not highly  
369 expressed in non-responders. This could be due to technical problems, since the Nim protein  
370 sequence contains only partial CDS (<https://www.ebi.ac.uk/ena/data/view/AGN03877>).  
371 Moreover, *nim*-negative strains of *B. fragilis* can tolerate high levels of metronidazole  
372 indicating the importance of other mechanisms of resistance (16).

373 Remarkably, *cas* genes of *G. vaginalis* were highly up-regulated in samples from patients that  
374 did not respond to metronidazole treatment. The CRISPR-Cas genes are present in about half  
375 of all Bacteria and most Archaea (45); they represent a mechanism of adaptive immunity  
376 which protects the prokaryotic cell against foreign DNA and has been developed into a

377 universal tool for genome editing (46). The *cas* genes of *G. vaginalis* belong to the *E. coli*  
378 subtype and were found in about half of the clinical isolates (36). Their up-regulation might  
379 reflect increased phage attacks in BV. Phages have been hypothesized to be crucial for the  
380 etiology of BV by causing the collapse of *Lactobacillus* populations (47); accordingly, *L.*  
381 *iners* upregulates its CRISPR-Cas system in BV (22). More than 400 annotated prophage  
382 sequences were found in 39 *Gardenerella* strains (29). They might be induced to enter the  
383 lytic cycle by the change in pH accompanying the shift to BV. However, the viral transcripts  
384 contributed 0.1% of the total metatranscriptome in both non-responders and responders before  
385 treatment.

386 The upregulation of CRISPR-Cas system genes in *G. vaginalis* from those patients that did  
387 not respond to treatment by metronidazole suggests that the CRISPR-Cas system might have a  
388 role in mitigating the DNA damaging effect of metronidazole. In addition to providing  
389 adaptive immunity, CRISPR-Cas systems can have various additional functions (48) and it  
390 was shown that they can protect the cell against DNA damaging agents (49). The Cas1  
391 enzyme of *E. coli* (YgbT) physically and genetically interacts with the DNA repair system  
392 (RecBC, RuvB) and is recruited to DNA double strand breaks; moreover, YgbT is necessary  
393 for resistance of *E. coli* to DNA damage caused by the genotoxic antibiotic mitomycin C or  
394 UV light (49). Our findings suggest that the CRISPR-Cas system may protect the vaginal  
395 microbiota against the DNA damaging effect of metronidazole. If experimentally confirmed,  
396 this finding might open a new path to fight bacterial resistance against DNA damaging agents.  
397 For example, it would be worth testing if the susceptibility to metronidazole can be modified  
398 in *Gardnerella* isolates and possibly other vaginal pathogens according to the expression level  
399 of *cas* genes. It is not known how up-regulation of *cas* genes is regulated in the vaginal  
400 microbiota. It might be a response to phage attack, thus by suppressing *cas* genes the

401 susceptibility to phages might be increased simultaneously with the susceptibility to  
402 metronidazole. Using CRISPR engineered phages for therapy of dysbiotic communities has  
403 been considered as one of many options of new therapeutic strategies based on a deeper  
404 understanding of the human microbiome (50).

405 *L. iners* and *L. crispatus* dominate their respective CST in the healthy vaginal microbiota.  
406 There were many factors observed by laboratory or genomic studies (37,51,52) which suggest  
407 that more protection against dysbiosis is provided by *L. crispatus* rather than by *L. iners*. Here  
408 we analyzed which genes are actually highly expressed *in vivo*: We observed that genes  
409 encoding proteins for the production of H<sub>2</sub>O<sub>2</sub> and D-lactic acid were highly expressed in *L.*  
410 *crispatus*. H<sub>2</sub>O<sub>2</sub> inhibits BV associated bacteria, but it has been questioned if its level in the  
411 vaginal milieu is high enough, and it was suggested that lactic acid is more protective (53). In  
412 *L. iners*, the genes for the pore-forming toxins inerolysin and hemolysin C were highly active,  
413 supporting the hypothesis that *L. iners* may play an ambiguous role in the vaginal econiche  
414 and is associated with vaginal dysbiosis (26,54).

415

## 416 **Conclusions**

417 This first study of the *in vivo* transcriptional activity of vaginal fluid microbiota during  
418 metronidazole treatment of BV focused on possible reasons for the lack of response to  
419 antibiotic therapy in some patients. Genes related to activation of the prodrug and repairing  
420 the DNA damage caused by metronidazole were shown to be differentially expressed in  
421 responders and non-responders. A completely new role for Cas proteins is hypothesized  
422 which warrants closer inspection and may help to develop more efficient novel therapies to  
423 improve the treatment of BV.

424

## 425 **Material and Methods**

### 426 **Study design**

427 Vaginal fluid samples of women analyzed here were a subset of the samples obtained during a  
428 randomized controlled clinical trial described previously (5). The trial protocol was approved  
429 by the local ethics committee (Ärzttekammer Nordrhein - Medical Association North Rhine)  
430 and written consent was obtained from all participants. The clinical trial was conducted in  
431 accordance with the Declaration of Helsinki on Ethical Principles for Medical Research  
432 Involving Human Subjects. Principles and guidelines for good clinical practice were followed.  
433 The study was registered on ClinicalTrials.gov with the identifier NCT02687789. Briefly,  
434 women were included into the clinical trial if they were BV positive according to Amsel  
435 criteria and Nugent score and were biofilm positive on vaginal epithelial cells and positive for  
436 extracellular polysaccharides (EPS) in urine. For treatment of acute BV, they received 2 g of  
437 metronidazole orally and were afterwards treated with an intravaginal pessary for three weeks,  
438 twice a week. Samples were taken during acute BV (visit 1), after receiving metronidazole 7  
439 to 28 days after visit 1 (visit 2), after pessary application one week after visit 2 (visit 3), after  
440 continued pessary application two weeks after visit 3 (visit 4) and during follow up three  
441 months after visit 4 (visit 5).

442 The aim of the clinical trial had been to compare the effectiveness of two different types of  
443 pessary. The results and the taxonomic composition of the vaginal microbial communities  
444 have been reported (5). For the metatranscriptome analysis reported here, we chose a subset  
445 of 14 patients from the clinical trial. These 14 patients consisted of two groups named “with  
446 response to treatment” (n = 8) and “no response to treatment” (n = 6) (Fig. 1). Among the

447 eight patients who responded to treatment, six had no recurrence and two experienced  
448 recurrence during the three months follow-up. For the analysis of lack of response to  
449 metronidazole, samples from all 14 patients were analyzed at two timepoints, acute BV (visit  
450 1) and 7 to 28 days after antibiotic treatment (visit 2) (28 samples in total). For the analysis of  
451 recurrence, samples from all 5 visits were analyzed for 4 patients (two without recurrence and  
452 two with) (20 samples in total). These four patients all received the commercially available  
453 lactic acid pessary after metronidazole therapy at visit 3 and 4. Nugent score >6 was used to  
454 determine BV status since it is considered the gold standard for BV diagnosis (55) (Table S1  
455 sheet 1). The BV status at visit 5 was determined by Amsel criteria as there was no Nugent  
456 score available at that timepoint. The sample ID was obtained by concatenating the patient ID  
457 and letters “a” to “e” indicating visit 1 to 5.

#### 458 **Sample collection and transport**

459 Vaginal fluid was obtained by infusing 2 ml of saline solution into the vagina followed by  
460 rotation against the vaginal wall with a speculum and then collecting the vaginal fluid with a  
461 syringe. Approximately 700 µl were immediately transferred to a tube containing 2 ml  
462 RNAprotect (Qiagen, Germany). Tubes were immediately frozen at -20°C, transported at -  
463 20°C within a week and stored at -70°C.

#### 464 **RNA extraction and mRNA enrichment**

465 RNA was extracted from 1 ml vaginal fluid suspension using the MO BIO  
466 PowerMicrobiome™ RNA Isolation Kit (Qiagen, Germany) with pretreatment: Vaginal fluid  
467 was centrifuged at 13,000 rpm for 1 minute. The pellet was resuspended in MoBio lysis buffer  
468 and this suspension was added to the supplied bead tubes filled with 500 µl ice-cold  
469 Phenol:Chloroform:Isoamyl Alcohol solution (Carl Roth, Germany). The bead-suspension

470 mix was shaken at 5 m/s for 1 minute in 3 intervals which were 2 minutes apart using the MO  
471 BIO PowerLyzer™ (Qiagen, Germany). After centrifugation for 1 minute at 13,000 rpm and  
472 4°C the upper phase containing the RNA was further processed according to the  
473 manufacturer's instructions including DNase I treatment. RNA was eluted in 100µl nuclease  
474 free water and vacuum concentrated to 50 µl. The Ribo-Zero Gold rRNA Removal Kit  
475 (Epidemiology) by Illumina (USA) was then used for mRNA enrichment with ethanol  
476 precipitation according to the manufacturer's instructions. Integrity of RNA was evaluated  
477 using a Bioanalyzer 2100 (Agilent, Germany).

#### 478 **Library preparation, sequencing and preprocessing of sequencing data**

479 Paired-end mRNA Illumina sequencing libraries were constructed with the Script Seq  
480 Illumina Kit. Strand specific paired end sequencing was performed on the HiSeq 2500  
481 Sequencer to yield  $2 \times 110$  bp paired-end reads. Primers and sequencing adaptors were  
482 removed from raw sequencing data, followed by clipping the bases with quality score  $< 20$   
483 from the reads using Fastq-Mcf (56). After clipping, the remaining reads shorter than 50 were  
484 removed. Thereafter, the ribosomal RNA reads were eliminated using SortMeRNA v2.0 (57)  
485 with the default parameters.

#### 486 **Taxonomy assignment using Kraken**

487 Kraken (27), an accurate and ultra-fast taxonomy assignment tool for metagenomes was used  
488 to determine the taxonomic composition of the metatranscriptome data. Kraken uses the K-  
489 mer strategy and the lowest common ancestor (LCA) algorithm to affiliate a given read to a  
490 taxon. The standard Kraken database with addition of the human genome was used to identify  
491 human reads. This standard database consists of prokaryote genomes (2786), virus genomes  
492 (4418). The human genome (ver. GRCh38) was additionally downloaded from NCBI.

493 The ref\_Genome database contained 163 bacterial genomes from 105 species of bacteria,  
494 including 147 genomes from the urogenital subset of the HMP reference genome sequence  
495 data (HMRGD). The complete list of reference genomes in the ref\_Genome database can be  
496 found in Table S1 sheet 3. All results on the taxonomic composition in this study were  
497 achieved based on this database.

#### 498 **Short reads alignment by BWA**

499 Kraken was used for taxonomy classification, while BWA was applied to determine the  
500 expression of genes. A reference gene database named ref\_Gene was constructed which  
501 contained the genes from the urogenital tract subset of the HMRGD and the genes from 9  
502 additional genomes (Table S1 sheet 4). The genes of *Gardnerella sp.* 26-12, *Gardnerella sp.*  
503 30-4 could not be included because only less than half of their CDS are available (around  
504 1000 genes). The short reads alignment was performed using BWA with the BWA-MEM (58)  
505 algorithm. A mapping seed length of 31 which is much longer than the default seed length 19  
506 was applied to achieve reliable alignments. Reads that mapped with mapping quality score  
507 (MAPQ) lower than 10 were excluded. MAPQ contains the Phred-scaled posterior probability  
508 that the mapping position is wrong (59).

#### 509 **KEGG Orthologous (KO) gene annotation of ref\_Gene database**

510 The ref\_Gene database was annotated using KEGG prokaryote protein sequences. The KEGG  
511 prokaryote protein sequence database represents a non-redundant protein dataset of Bacteria  
512 and Archaea on the species level and contains about 7 million non-redundant peptide  
513 sequences grouped into 14,390 distinct KO genes. A KO gene contains several genes from  
514 different species with similar function. DIAMOND (60), a much faster alternative to  
515 BLASTX was applied to map the ref\_Gene sequences against the KEGG prokaryote protein

516 sequence database with its “more sensitive mode”. To obtain reliable annotation, only  
517 alignments with sequence identity  $\geq 50$  and E-value  $\leq 1e-5$  and query coverage  $\geq 70\%$   
518 were taken into account. By annotating the genes in the ref\_Gene database to KO genes, we  
519 were able to determine the expression profile of KO genes, and investigate the activity shifts  
520 in BV based on differential expression analysis of KO genes. The cumulative dominance  
521 analysis and PCA were carried out using Primer 7 (61).

## 522 **Differential expression (DE) analysis**

523 All differential expression (DE) analyses were performed using the R package edgeR (62).  
524 The Benjamini Hochberg (BH) method was used to correct the p value of DE analysis with  
525 the false discovery rate (FDR) for multiple comparisons. Genes with FDR smaller than 0.05  
526 were considered as significantly differentially regulated. The sample groups defined for each  
527 comparison are listed in Table S1 sheet 1.

## 528 **Detection of putative metronidazole resistance related genes**

529 To detect the expression of previously reported putative metronidazole resistance genes such  
530 as recA, recA-mediated autopeptidase (Rma), peroxiredoxin, nitroimidazole resistance protein  
531 (NIM), ferredoxin/ferredoxin-NADP reductase (FNR), nitroreductase and ferredoxin, we  
532 examined the expression level of these genes for *G. vaginalis* in the vaginal community from  
533 patients without response to metronidazole treatment (n = 6) as well as with response (n = 4).  
534 As most of these genes do not have corresponding KO genes, we annotated the ref\_Gene  
535 database based on the sequences of these genes using BLASTN. The sequences were  
536 retrieved from ENA by key words of each “ferredoxin, NADPH flavin oxidoreductase,  
537 nitroreductase, peroxiredoxin, pyruvate ferredoxin oxidoreductase, recA, nitroimidazole  
538 resistance” plus *G. vaginalis*. In total, 155 unique sequences of *G. vaginalis* were obtained for



539 the annotation of ref\_Gene database. The identification of duplicate sequences was done by  
540 SeqKit (63).

#### 541 **Availability of data and material**

542 The sequencing data have been deposited in the European Nucleotide Archive with accession  
543 number PRJEB21446.

#### 544 **Authors' contributions**

545 This study was designed by IWD and CG. CM and CA provided the clinical samples. RNA  
546 extraction and mRNA enrichment was performed by CG. SB prepared cDNA libraries, and  
547 performed Illumina sequencing. Z-LD performed all the data analyses. Data interpretation and  
548 visualization were done by IWD, Z-LD and CG. Z-LD and CG wrote the manuscript draft,  
549 and all authors reviewed the manuscript.

#### 550 **Acknowledgements**

551 This work was supported by ZIM project grant KF3134201MD3 of the Bundesministerium  
552 für Wirtschaft und Energie (BMWi), Germany. The clinical study was funded by Dr. August  
553 Wolff GmbH & Co. KG Arzneimittel within the ZIM project KF3134201MD3.

554

#### 555 **Reference**

556

- 557 1. Ravel J, Gajer P, Abdo Z, Schneider GM, Koenig SS, McCulle SL, Karlebach S, Gorle  
558 R, Russell J, Tacket CO, Brotman RM, Davis CC, Ault K, Peralta L, Forney LJ. 2011.  
559 Vaginal microbiome of reproductive-age women. Proc Natl Acad Sci U S A 108 Suppl  
560 1:4680-4687. doi:1002611107 [pii];10.1073/pnas.1002611107 [doi].

- 561 2. van de Wijgert JH, Borgdorff H, Verhelst R, Crucitti T, Francis S, Verstraelen H,  
562 Jaspers V. 2014. The vaginal microbiota: what have we learned after a decade of  
563 molecular characterization? PLoS One 9:e105998. doi:10.1371/journal.pone.0105998  
564 [doi];PONE-D-14-20877 [pii].
- 565 3. Onderdonk AB, Delaney ML, Fichorova RN. 2016. The Human Microbiome during  
566 Bacterial Vaginosis. Clin Microbiol Rev 29:223-238. doi:29/2/223  
567 [pii];10.1128/CMR.00075-15 [doi].
- 568 4. Dols JA, Molenaar D, van der Helm JJ, Caspers MP, de KA-B, Schuren FH,  
569 Speksnijder AG, Westerhoff HV, Richardus JH, Boon ME, Reid G, de Vries HJ, Kort R.  
570 2016. Molecular assessment of bacterial vaginosis by Lactobacillus abundance and  
571 species diversity. BMC Infect Dis 16:180. doi:10.1186/s12879-016-1513-3  
572 [doi];10.1186/s12879-016-1513-3 [pii].
- 573 5. Gottschick C, Deng Z-L, Vital M, Masur C, Abels C, Pieper D, Rohde M, Mendling W,  
574 Wagner-Dobler I. 2017. Treatment of biofilms in bacterial vaginosis by an amphoteric  
575 tenside pessary - clinical study and microbiome analysis. Microbiome 5:119.
- 576 6. Schellenberg JJ, Patterson MH, Hill JE. 2017. Gardnerella vaginalis diversity and  
577 ecology in relation to vaginal symptoms. Res Microbiol 168:837-844. doi:S0923-  
578 2508(17)30060-8 [pii];10.1016/j.resmic.2017.02.011 [doi].
- 579 7. Ahmed A, Earl J, Retchless A, Hillier SL, Rabe LK, Cherpes TL, Powell E, Janto B,  
580 Eutsey R, Hiller NL, Boissy R, Dahlgren ME, Hall BG, Costerton JW, Post JC, Hu FZ,  
581 Ehrlich GD. 2012. Comparative genomic analyses of 17 clinical isolates of Gardnerella  
582 vaginalis provide evidence of multiple genetically isolated clades consistent with  
583 subspeciation into genovars. J Bacteriol 194:3922-3937. doi:JB.00056-12  
584 [pii];10.1128/JB.00056-12 [doi].
- 585 8. Hill JE, Goh SH, Money DM, Doyle M, Li A, Crosby WL, Links M, Leung A, Chan D,  
586 Hemmingsen SM. 2005. Characterization of vaginal microflora of healthy, nonpregnant  
587 women by chaperonin-60 sequence-based methods. Am J Obstet Gynecol 193:682-692.  
588 doi:S0002-9378(05)00340-6 [pii];10.1016/j.ajog.2005.02.094 [doi].
- 589 9. Paramel JT, Schellenberg JJ, Hill JE. 2012. Resolution and characterization of distinct  
590 cpn60-based subgroups of Gardnerella vaginalis in the vaginal microbiota. PLoS One  
591 7:e43009. doi:10.1371/journal.pone.0043009 [doi];PONE-D-12-12121 [pii].
- 592 10. Chaban B, Links MG, Jayaprakash TP, Wagner EC, Bourque DK, Lohn Z, Albert AY,  
593 van SJ, Reid G, Hemmingsen SM, Hill JE, Money DM. 2014. Characterization of the  
594 vaginal microbiota of healthy Canadian women through the menstrual cycle.  
595 Microbiome 2:23. doi:10.1186/2049-2618-2-23 [doi];2049-2618-2-23 [pii].
- 596 11. Albert AY, Chaban B, Wagner EC, Schellenberg JJ, Links MG, van SJ, Reid G,  
597 Hemmingsen SM, Hill JE, Money D. 2015. A Study of the Vaginal Microbiome in  
598 Healthy Canadian Women Utilizing cpn60-Based Molecular Profiling Reveals Distinct  
599 Gardnerella Subgroup Community State Types. PLoS One 10:e0135620.  
600 doi:10.1371/journal.pone.0135620 [doi];PONE-D-15-15097 [pii].

- 601 12. Schellenberg JJ, Paramel JT, Withana GN, Patterson MH, Vaneechoutte M, Hill JE.  
602 2016. Gardnerella vaginalis Subgroups Defined by cpn60 Sequencing and Sialidase  
603 Activity in Isolates from Canada, Belgium and Kenya. PLoS One 11:e0146510.  
604 doi:10.1371/journal.pone.0146510 [doi];PONE-D-15-36020 [pii].
- 605 13. Bradshaw CS, Morton AN, Garland SM, Horvath LB, Kuzevska I, Fairley CK. 2005.  
606 Evaluation of a point-of-care test, BVBlue, and clinical and laboratory criteria for  
607 diagnosis of bacterial vaginosis. J Clin Microbiol 43:1304-1308. doi:43/3/1304  
608 [pii];10.1128/JCM.43.3.1304-1308.2005 [doi].
- 609 14. Schuyler JA, Mordechai E, Adelson ME, Sobel JD, Gygax SE, Hilbert DW. 2016.  
610 Identification of intrinsically metronidazole-resistant clades of Gardnerella vaginalis.  
611 Diagn Microbiol Infect Dis 84:1-3. doi:S0732-8893(15)00360-0  
612 [pii];10.1016/j.diagmicrobio.2015.10.006 [doi].
- 613 15. Bradshaw CS, Pirotta M, De GD, Hocking JS, Morton AN, Garland SM, Fehler G,  
614 Morrow A, Walker S, Vodstrcil LA, Fairley CK. 2012. Efficacy of oral metronidazole  
615 with vaginal clindamycin or vaginal probiotic for bacterial vaginosis: randomised  
616 placebo-controlled double-blind trial. PLoS One 7:e34540.  
617 doi:10.1371/journal.pone.0034540 [doi];PONE-D-11-24250 [pii].
- 618 16. Lofmark S, Edlund C, Nord CE. 2010. Metronidazole is still the drug of choice for  
619 treatment of anaerobic infections. Clin Infect Dis 50 Suppl 1:S16-S23.  
620 doi:10.1086/647939 [doi].
- 621 17. Mendz GL, Megraud F. 2002. Is the molecular basis of metronidazole resistance in  
622 microaerophilic organisms understood? Trends Microbiol 10:370-375.  
623 doi:S0966842X02024058 [pii].
- 624 18. Lofmark S, Fang H, Hedberg M, Edlund C. 2005. Inducible metronidazole resistance  
625 and nim genes in clinical Bacteroides fragilis group isolates. Antimicrob Agents  
626 Chemother 49:1253-1256. doi:49/3/1253 [pii];10.1128/AAC.49.3.1253-1256.2005  
627 [doi].
- 628 19. Steffens LS, Nicholson S, Paul LV, Nord CE, Patrick S, Abratt VR. 2010. Bacteroides  
629 fragilis RecA protein overexpression causes resistance to metronidazole. Res Microbiol  
630 161:346-354. doi:S0923-2508(10)00085-9 [pii];10.1016/j.resmic.2010.04.003 [doi].
- 631 20. Hilbert DW, Smith WL, Paulish-Miller TE, Chadwick SG, Toner G, Mordechai E,  
632 Adelson ME, Sobel JD, Gygax SE. 2016. Utilization of molecular methods to identify  
633 prognostic markers for recurrent bacterial vaginosis. Diagn Microbiol Infect Dis.  
634 doi:S0732-8893(16)30197-3 [pii];10.1016/j.diagmicrobio.2016.07.003 [doi].
- 635 21. Ferreira CST, Donders GG, Parada CMGL, Tristao ADR, Fernandes T, da Silva MG,  
636 Marconi C. 2017. Treatment failure of bacterial vaginosis is not associated with higher  
637 loads of Atopobium vaginae and Gardnerella vaginalis. J Med Microbiol 66:1217-1224.  
638 doi:10.1099/jmm.0.000561 [doi].
- 639 22. Macklaim JM, Fernandes AD, Di Bella JM, Hammond JA, Reid G, Gloor GB. 2013.  
640 Comparative meta-RNA-seq of the vaginal microbiota and differential expression by

- 641 Lactobacillus iners in health and dysbiosis. *Microbiome* 1:12. doi:2049-2618-1-12  
642 [pii];10.1186/2049-2618-1-12 [doi].
- 643 23. Bradshaw CS, Morton AN, Hocking J, Garland SM, Morris MB, Moss LM, Horvath  
644 LB, Kuzevska I, Fairley CK. 2006. High recurrence rates of bacterial vaginosis over the  
645 course of 12 months after oral metronidazole therapy and factors associated with  
646 recurrence. *J Infect Dis* 193:1478-1486. doi:JID36020 [pii];10.1086/503780 [doi].
- 647 24. Sobel JD, Schmitt C, Meriwether C. 1993. Long-term follow-up of patients with  
648 bacterial vaginosis treated with oral metronidazole and topical clindamycin. *J Infect Dis*  
649 167:783-784.
- 650 25. Turovskiy Y, Sutyak NK, Chikindas ML. 2011. The aetiology of bacterial vaginosis. *J*  
651 *Appl Microbiol* 110:1105-1128. doi:10.1111/j.1365-2672.2011.04977.x [doi].
- 652 26. Petrova MI, Reid G, Vaneechoutte M, Lebeer S. 2016. Lactobacillus iners: Friend or  
653 Foe? *Trends Microbiol*. doi:S0966-842X(16)30181-0 [pii];10.1016/j.tim.2016.11.007  
654 [doi].
- 655 27. Wood DE, Salzberg SL. 2014. Kraken: ultrafast metagenomic sequence classification  
656 using exact alignments. *Genome Biol* 15:R46. doi:gb-2014-15-3-r46 [pii];10.1186/gb-  
657 2014-15-3-r46 [doi].
- 658 28. The Human Microbiome Project Consortium. 2012. A framework for human  
659 microbiome research. *Nature* 486:215-221. doi:10.1038/nature11209.
- 660 29. Malki K, Shapiro JW, Price TK, Hilt EE, Thomas-White K, Sircar T, Rosenfeld AB,  
661 Kuffel G, Zilliox MJ, Wolfe AJ, Putonti C. 2016. Genomes of Gardnerella Strains  
662 Reveal an Abundance of Prophages within the Bladder Microbiome. *PLoS One*  
663 11:e0166757. doi:10.1371/journal.pone.0166757 [doi];PONE-D-16-20473 [pii].
- 664 30. Deng ZL, Szafranski SP, Jarek M, Bhujra S, Wagner-Dobler I. 2017. Dysbiosis in  
665 chronic periodontitis: Key microbial players and interactions with the human host. *Sci*  
666 *Rep* 7:3703. doi:10.1038/s41598-017-03804-8 [doi];10.1038/s41598-017-03804-8 [pii].
- 667 31. Hellinga HW, Evans PR. 1985. Nucleotide sequence and high-level expression of the  
668 major Escherichia coli phosphofructokinase. *Eur J Biochem* 149:363-373.
- 669 32. Arnold RJ, Reilly JP. 1999. Observation of Escherichia coli ribosomal proteins and their  
670 posttranslational modifications by mass spectrometry. *Anal Biochem* 269:105-112.  
671 doi:S0003-2697(98)93077-9 [pii];10.1006/abio.1998.3077 [doi].
- 672 33. Bubunencko M, Baker T, Court DL. 2007. Essentiality of ribosomal and transcription  
673 antitermination proteins analyzed by systematic gene replacement in Escherichia coli. *J*  
674 *Bacteriol* 189:2844-2853. doi:JB.01713-06 [pii];10.1128/JB.01713-06 [doi].
- 675 34. Webb AJ, Homer KA, Hosie AH. 2008. Two closely related ABC transporters in  
676 Streptococcus mutans are involved in disaccharide and/or oligosaccharide uptake. *J*  
677 *Bacteriol* 190:168-178. doi:JB.01509-07 [pii];10.1128/JB.01509-07 [doi].

- 678 35. Shipkowski S, Brenchley JE. 2006. Bioinformatic, genetic, and biochemical evidence  
679 that some glycoside hydrolase family 42 beta-galactosidases are arabinogalactan type I  
680 oligomer hydrolases. *Appl Environ Microbiol* 72:7730-7738. doi:AEM.01306-06  
681 [pii];10.1128/AEM.01306-06 [doi].
- 682 36. Pleckaityte M, Zilnyte M, Zvirbliene A. 2012. Insights into the CRISPR/Cas system of  
683 *Gardnerella vaginalis*. *BMC Microbiol* 12:301. doi:1471-2180-12-301  
684 [pii];10.1186/1471-2180-12-301 [doi].
- 685 37. Ojala T, Kankainen M, Castro J, Cerca N, Edelman S, Westerlund-Wikstrom B, Paulin  
686 L, Holm L, Auvinen P. 2014. Comparative genomics of *Lactobacillus crispatus* suggests  
687 novel mechanisms for the competitive exclusion of *Gardnerella vaginalis*. *BMC*  
688 *Genomics* 15:1070. doi:1471-2164-15-1070 [pii];10.1186/1471-2164-15-1070 [doi].
- 689 38. Hertzberger R, Arents J, Dekker HL, Pridmore RD, Gysler C, Kleerebezem M, de  
690 Mattos MJ. 2014. H<sub>2</sub>O<sub>2</sub> production in species of the *Lactobacillus acidophilus*  
691 group: a central role for a novel NADH-dependent flavin reductase. *Appl Environ*  
692 *Microbiol* 80:2229-2239. doi:AEM.04272-13 [pii];10.1128/AEM.04272-13 [doi].
- 693 39. Gelber SE, Aguilar JL, Lewis KL, Ratner AJ. 2008. Functional and phylogenetic  
694 characterization of Vaginolysin, the human-specific cytolysin from *Gardnerella*  
695 *vaginalis*. *J Bacteriol* 190:3896-3903. doi:JB.01965-07 [pii];10.1128/JB.01965-07 [doi].
- 696 40. Frank JA, Reich CI, Sharma S, Weisbaum JS, Wilson BA, Olsen GJ. 2008. Critical  
697 evaluation of two primers commonly used for amplification of bacterial 16S rRNA  
698 genes. *Appl Environ Microbiol* 74:2461-2470. doi:AEM.02272-07  
699 [pii];10.1128/AEM.02272-07 [doi].
- 700 41. Srinivasan S, Hoffman NG, Morgan MT, Matsen FA, Fiedler TL, Hall RW, Ross FJ,  
701 McCoy CO, Bumgarner R, Marrazzo JM, Fredricks DN. 2012. Bacterial communities in  
702 women with bacterial vaginosis: high resolution phylogenetic analyses reveal  
703 relationships of microbiota to clinical criteria. *PLoS One* 7:e37818.  
704 doi:10.1371/journal.pone.0037818 [doi];PONE-D-12-04403 [pii].
- 705 42. Ling Z, Kong J, Liu F, Zhu H, Chen X, Wang Y, Li L, Nelson KE, Xia Y, Xiang C.  
706 2010. Molecular analysis of the diversity of vaginal microbiota associated with bacterial  
707 vaginosis. *BMC Genomics* 11:488. doi:1471-2164-11-488 [pii];10.1186/1471-2164-11-  
708 488 [doi].
- 709 43. Oakley BB, Fiedler TL, Marrazzo JM, Fredricks DN. 2008. Diversity of human vaginal  
710 bacterial communities and associations with clinically defined bacterial vaginosis. *Appl*  
711 *Environ Microbiol* 74:4898-4909. doi:AEM.02884-07 [pii];10.1128/AEM.02884-07  
712 [doi].
- 713 44. Gerrits MM, van der Wouden EJ, Bax DA, van Zwet AA, van Vliet AH, de JA, Kusters  
714 JG, Thijs JC, Kuipers EJ. 2004. Role of the rdxA and frxA genes in oxygen-dependent  
715 metronidazole resistance of *Helicobacter pylori*. *J Med Microbiol* 53:1123-1128.  
716 doi:10.1099/jmm.0.45701-0 [doi].

- 717 45. Makarova KS, Wolf YI, Alkhnbashi OS, Costa F, Shah SA, Saunders SJ, Barrangou R,  
718 Brouns SJ, Charpentier E, Haft DH, Horvath P, Moineau S, Mojica FJ, Terns RM, Terns  
719 MP, White MF, Yakunin AF, Garrett RA, van der Oost J, Backofen R, Koonin EV.  
720 2015. An updated evolutionary classification of CRISPR-Cas systems. *Nat Rev*  
721 *Microbiol* 13:722-736. doi:nrmicro3569 [pii];10.1038/nrmicro3569 [doi].
- 722 46. Doudna JA, Charpentier E. 2014. Genome editing. The new frontier of genome  
723 engineering with CRISPR-Cas9. *Science* 346:1258096. doi:346/6213/1258096  
724 [pii];10.1126/science.1258096 [doi].
- 725 47. Blackwell AL. 1999. Vaginal bacterial phaginosi? *Sex Transm Infect* 75:352-353.
- 726 48. Westra ER, Buckling A, Fineran PC. 2014. CRISPR-Cas systems: beyond adaptive  
727 immunity. *Nat Rev Microbiol* 12:317-326. doi:nrmicro3241 [pii];10.1038/nrmicro3241  
728 [doi].
- 729 49. Babu M, Beloglazova N, Flick R, Graham C, Skarina T, Nocek B, Gagarinova A,  
730 Pogoutse O, Brown G, Binkowski A, Phanse S, Joachimiak A, Koonin EV, Savchenko  
731 A, Emili A, Greenblatt J, Edwards AM, Yakunin AF. 2011. A dual function of the  
732 CRISPR-Cas system in bacterial antiviral immunity and DNA repair. *Mol Microbiol*  
733 79:484-502. doi:10.1111/j.1365-2958.2010.07465.x [doi].
- 734 50. Belizario JE, Napolitano M. 2015. Human microbiomes and their roles in dysbiosis,  
735 common diseases, and novel therapeutic approaches. *Front Microbiol* 6:1050.  
736 doi:10.3389/fmicb.2015.01050 [doi].
- 737 51. France MT, Mendes-Soares H, Forney LJ. 2016. Genomic Comparisons of  
738 *Lactobacillus crispatus* and *Lactobacillus iners* Reveal Potential Ecological Drivers of  
739 Community Composition in the Vagina. *Appl Environ Microbiol* 82:7063-7073.  
740 doi:AEM.02385-16 [pii];10.1128/AEM.02385-16 [doi].
- 741 52. Rampersaud R, Planet PJ, Randis TM, Kulkarni R, Aguilar JL, Lehrer RI, Ratner AJ.  
742 2011. Inerolysin, a cholesterol-dependent cytolysin produced by *Lactobacillus iners*. *J*  
743 *Bacteriol* 193:1034-1041. doi:JB.00694-10 [pii];10.1128/JB.00694-10 [doi].
- 744 53. O'Hanlon DE, Moench TR, Cone RA. 2011. In vaginal fluid, bacteria associated with  
745 bacterial vaginosis can be suppressed with lactic acid but not hydrogen peroxide. *BMC*  
746 *Infect Dis* 11:200. doi:1471-2334-11-200 [pii];10.1186/1471-2334-11-200 [doi].
- 747 54. Vaneechoutte M. 2017. *Lactobacillus iners*, the unusual suspect. *Res Microbiol*  
748 168:826-836. doi:S0923-2508(17)30151-1 [pii];10.1016/j.resmic.2017.09.003 [doi].
- 749 55. Mohammadzadeh F, Dolatian M, Jorjani M, Alavi MH. 2014. Diagnostic value of  
750 Amsel's clinical criteria for diagnosis of bacterial vaginosis. *Glob J Health Sci* 7:8-14.  
751 doi:10.5539/gjhs.v7n3p8 [doi].
- 752 56. Aronesty E. 2011. ea-utils: Command-line tools for processing biological sequencing  
753 data. Durham, NC: Expression Analysis.

- 754 57. Kopylova E, Noe L, Touzet H. 2012. SortMeRNA: fast and accurate filtering of  
755 ribosomal RNAs in metatranscriptomic data. *Bioinformatics* 28:3211-3217. doi:bts611  
756 [pii];10.1093/bioinformatics/bts611 [doi].
- 757 58. Li H. 2013. Aligning sequence reads, clone sequences and assembly contigs with BWA-  
758 MEM. arXiv preprint arXiv:1303.3997.
- 759 59. Li H, Handsaker B, Wysoker A, Fennell T, Ruan J, Homer N, Marth G, Abecasis G,  
760 Durbin R. 2009. The Sequence Alignment/Map format and SAMtools. *Bioinformatics*  
761 25:2078-2079. doi:btp352 [pii];10.1093/bioinformatics/btp352 [doi].
- 762 60. Buchfink B, Xie C, Huson DH. 2015. Fast and sensitive protein alignment using  
763 DIAMOND. *Nat Methods* 12:59-60. doi:nmeth.3176 [pii];10.1038/nmeth.3176 [doi].
- 764 61. Clarke KR. 1993. Non-parametric multivariate analyses of changes in community  
765 structure. *Austral ecology* 18:117-143.
- 766 62. Robinson MD, McCarthy DJ, Smyth GK. 2010. edgeR: a Bioconductor package for  
767 differential expression analysis of digital gene expression data. *Bioinformatics* 26:139-  
768 140. doi:btp616 [pii];10.1093/bioinformatics/btp616 [doi].
- 769 63. Shen W, Le S, Li Y, Hu F. 2016. SeqKit: A Cross-Platform and Ultrafast Toolkit for  
770 FASTA/Q File Manipulation. *PLoS One* 11:e0163962.  
771 doi:10.1371/journal.pone.0163962 [doi];PONE-D-16-20820 [pii].

772

773

## 774 **Figures, tables and additional files**

775 **Fig. 1: Study design and taxonomic composition of vaginal fluid metatranscriptomes in**  
776 **BV and after treatment with metronidazole. (A). Time course of the clinical study. (B)**  
777 **Taxonomic composition of the metatranscriptome at visit 1 (diagnosis) and visit 2 (after**  
778 **metronidazole therapy). (C) Cumulative dominance of the vaginal microbiota in BV and**  
779 **non-BV. (D) The subspecies composition of the *G. vaginalis* sub-community. Species with**  
780 **average relative abundance smaller than 0.5% were grouped into “Others”. The red dot on top**  
781 **of the samples indicates BV. The digits indicate the patient ID, while the letters a-b denote**  
782 **visit 1-2. After the first sampling at visit 1 the patients were treated with metronidazole. Total**  
783 **putative bacterial mRNA reads were mapped to the ref\_Genome database using Kraken (see**

784 Methods for details). BV status was determined by Nugent score. In C, the “BV” and “NBV”  
785 in the parenthesis indicate BV and non-BV, respectively.

786 **Fig. 2: Average taxonomic composition of vaginal fluid samples in BV determined by**  
787 **16S rRNA amplicon sequencing (A) and metatranscriptome sequencing (B).** (A)

788 Amplicon sequencing was performed as described in our previous study (5) using primers V1-  
789 V2. (B) The taxonomy was assigned based on all cleaned reads after removal of human reads  
790 using Kraken and the ref\_Genome database. The top 12 most abundant taxa for each approach  
791 are shown in A and B. Relative average abundance was calculated based on all mapped reads.  
792 Mean and standard error are shown.

793 **Fig. 3: Principal components analysis (PCA) based on taxonomic profiles and activity**  
794 **profiles in BV and after metronidazole therapy (non-BV).** (A) The PCA plot based on  
795 taxonomic profile using 16S rRNA gene sequencing. (B) The PCA based on taxonomic  
796 composition determined by metatranscriptome. (C) The PCA plot based on KO gene  
797 expression profile. The communities at visit 1 (BV) and visit 2 (after metronidazole therapy,  
798 non-BV) from 14 patients are shown. In the PCA biplots of taxonomy composition (Fig. 3A-  
799 B), the taxa with multivariate (multiple) correlation higher than 0.3 are illustrated, while for  
800 PCA (Fig. 3C) of KO profiles the KO genes with correlation >0.2 are shown.

801

802 **Fig. 4: Changes in gene expression of *G. vaginalis* in patients responding to antibiotic**  
803 **treatment compared to non-responders.** (A) Expression of putative metronidazole  
804 resistance associated genes of *G. vaginalis* in vaginal fluid microbiota. (B) Differential  
805 expression of KO genes: Seven *cas* genes of *G. vaginalis* were highly up-regulated in  
806 communities from patients who did not respond to the treatment. (A) The expression  
807 value was calculated based on relative abundance of reads mapped onto *G. vaginalis* using



808 BWA. “NR1” (No Response 1) indicates the BV samples from six patients that did not  
809 respond to metronidazole treatment; “WR1” (With Response 1) represents the BV samples  
810 from four patients which afterwards responded to metronidazole. The dotplot illustrates the  
811 log<sub>2</sub>FC of the corresponding activity between *G. vaginalis* from non-responders and  
812 responders. The values in the heatmap were scaled using Z-score. In the figure legend, “exp.”  
813 indicates the relative expression level. (B) “NR1” samples were compared with “WR1”. KO  
814 genes with FDR ≤ 0.05 are colored in red or turquoise (significantly differentially regulated)  
815 while FDR > 0.05 are in grey.

816 **Fig. 5: Shifts in the vaginal microbiome over 3 months. (A) Taxonomic composition of**  
817 **the metatranscriptome in two patients that were stably non-BV (without recurrence)**  
818 **and two patients that experienced recurrence. (B) PCA of activity profiles based on KO**  
819 **genes from the same patients. (C) Gene expression *in vivo* of *L. crispatus* and *L. iners*. (A)**  
820 Acute BV and recurrence according to Nugent score are indicated as red dot. (B) Two women  
821 with recurrence (pink and blue color range) and two women without recurrence (green and  
822 orange color range) are shown. In the figure legend, BV indicates timepoint with BV, “R”  
823 indicates the recurrence and “H” represents health. The green and blue circles highlight  
824 healthy clusters, respectively, while the red circle highlights samples from BV. The arrows  
825 denote the temporal shifts of the communities during the treatment. (C) The Venn diagram  
826 indicates the unique KO genes of *L. crispatus* and *L. iners* as well as their shared KO genes.  
827 The innermost ring denotes the expression of KO genes by log<sub>2</sub>CPM, the outer ring illustrates  
828 the fold change of the expression of KO genes between *L. crispatus* dominated communities  
829 and *L. iners* dominated communities by log<sub>2</sub>FC. The KO genes are in descending order based  
830 on log<sub>2</sub>CPM. The small red triangles mark the inerolysin and hemolysin C genes, while blue

831 and green triangles mark the genes encoding proteins involved in the production of D-lactic  
832 acid and hydrogen peroxide, respectively.

833

## 834 **Supplementary Information**

835 **Fig. S1: Taxonomic composition of communities on the species level determined by**  
836 **metatranscriptome sequencing in non-BV and BV.** The species present in at least 2  
837 samples with relative abundance >1% are shown. The *Gardnerella* bladder isolates are  
838 illustrated separately from *G. vaginalis*. The sample name in red indicates the first BV  
839 incidence of patients with recurrence and purple depicts the second incidence.

## 840 **Supplementary Table S1: All supplementary data**

841 **Sheet 1: Sample description**

842 **Sheet 2: Read summary**

843 **Sheet 3: Genomes in the ref\_Genome database for taxonomic assignment**

844 **Sheet 4: Genomes in the ref\_Gene database with a total of 301,323 genes for functional**  
845 **assignment with BWA**

846 **Sheet 5: Species composition determined by Kraken based on the ref\_Genome database**  
847 **for taxonomic assignment**

848 **Sheet 6: Comparison of the community composition determined by 16S rRNA gene**  
849 **amplicon sequencing (V1-V2) and metatranscriptome sequencing**

850 **Sheet 7: Gene expression based on the ref\_Gene database for functional assignment with**  
851 **KO annotation**

852 **Sheet 8: The differential expression of KO genes between *L. crispatus* and *L. iners***

853 **Sheet 9: Expression of metronidazole activation and resistance associated genes in *G.***

854 *vaginalis*

855 **Sheet 10: Differential expression of KO genes of *G. vaginalis* from communities without**

856 **response to metronidazole treatment compared to those with response**

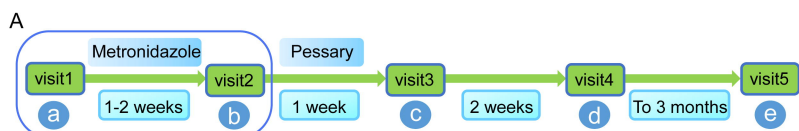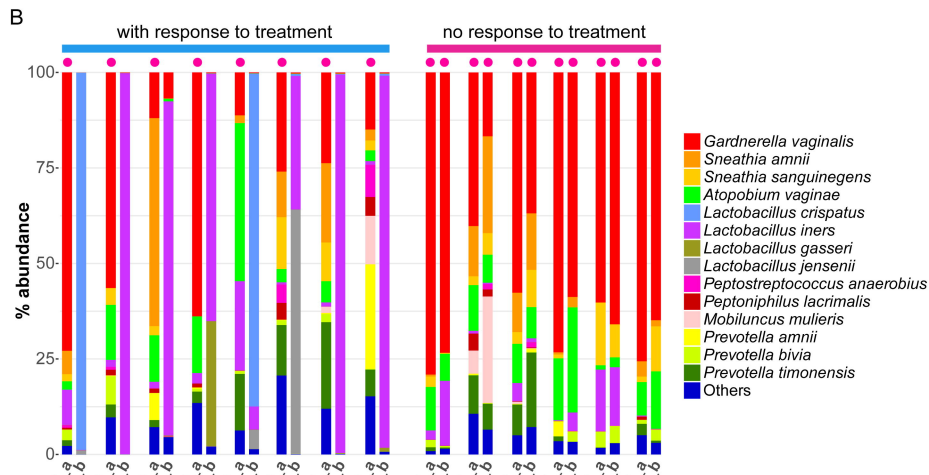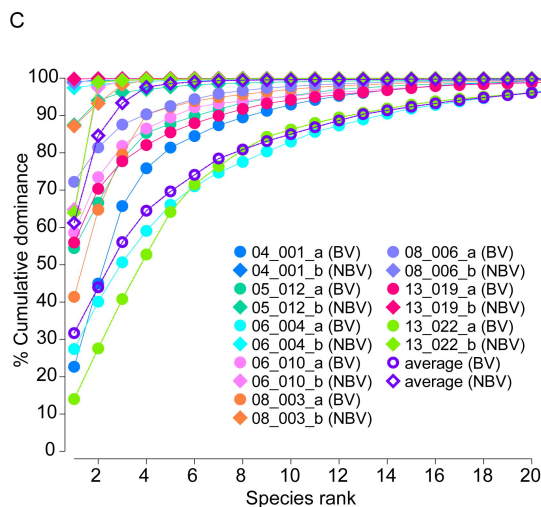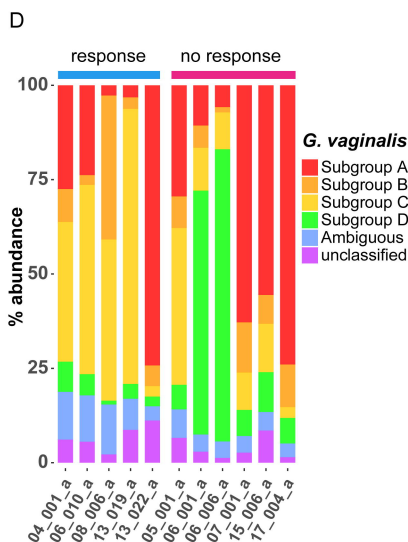

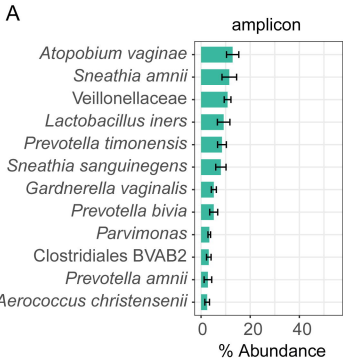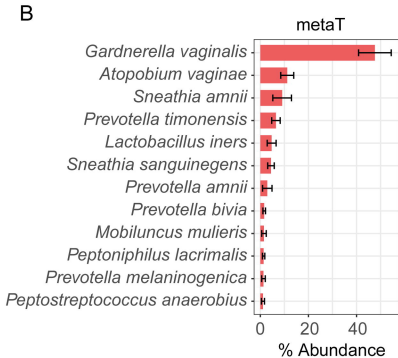

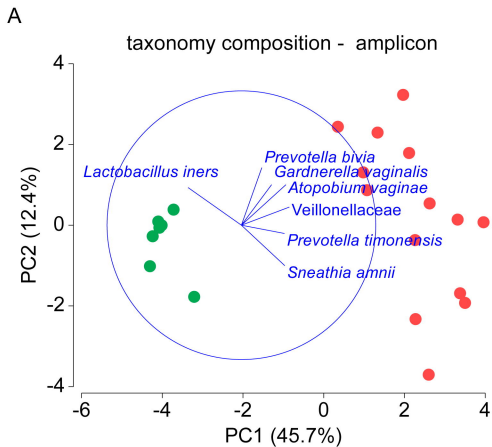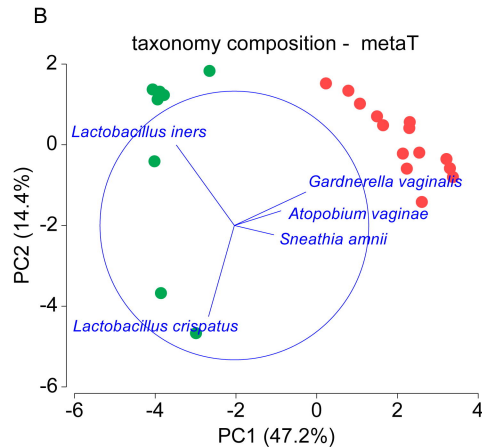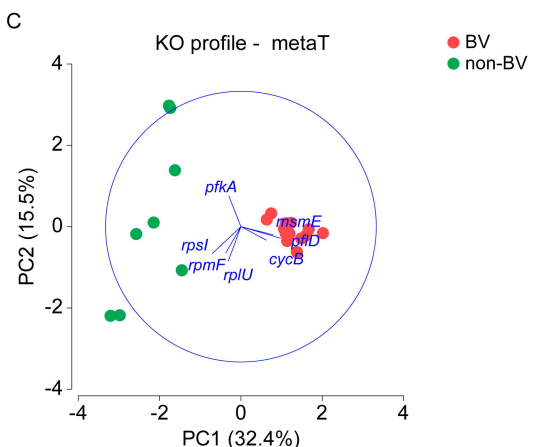

A

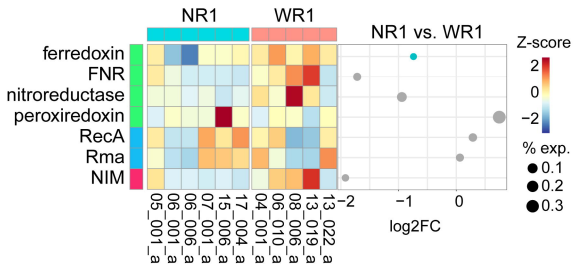

B

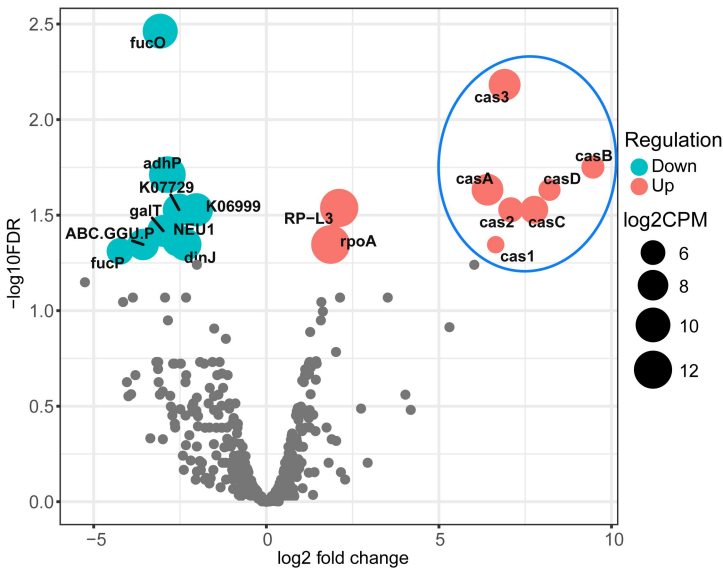



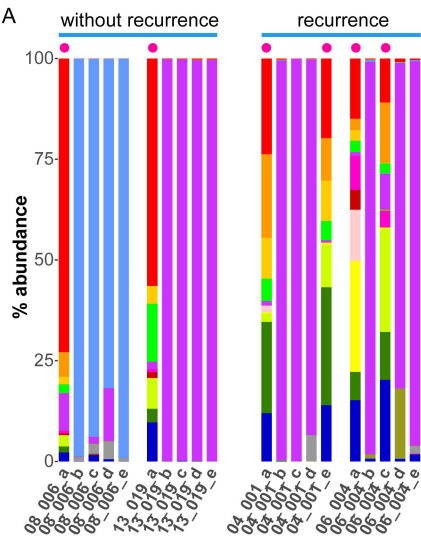

**B**

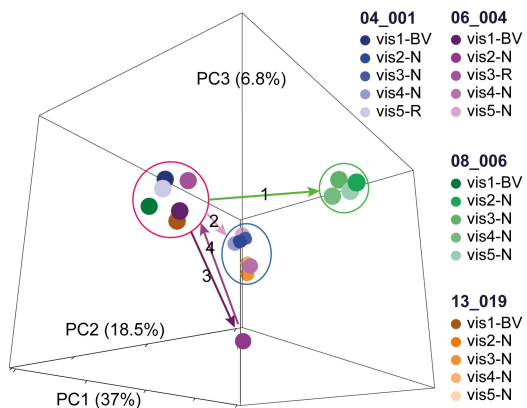

**C**

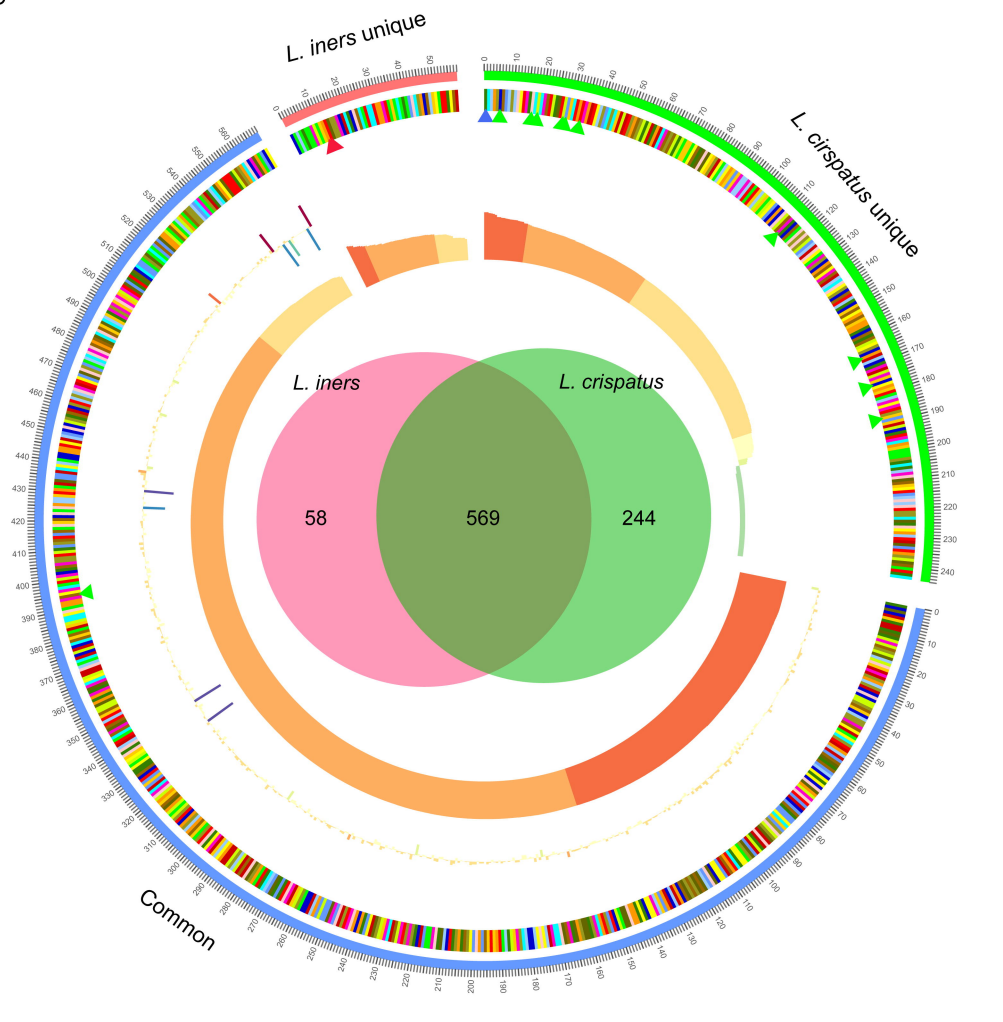

Source: https://www.biorxiv.org/content/10.1101/248302v3.full.pdf
